# Supplementary material for: A Combinatorial TIR1-Aux/IAA Co-Receptor System for Peach Fruit Softening
Source: Preprints.org preprint supplement (doi:10.20944/preprints202305.1262.v1), 2023-05-18
Supplement: Supplementary file 1 [file supplementary]

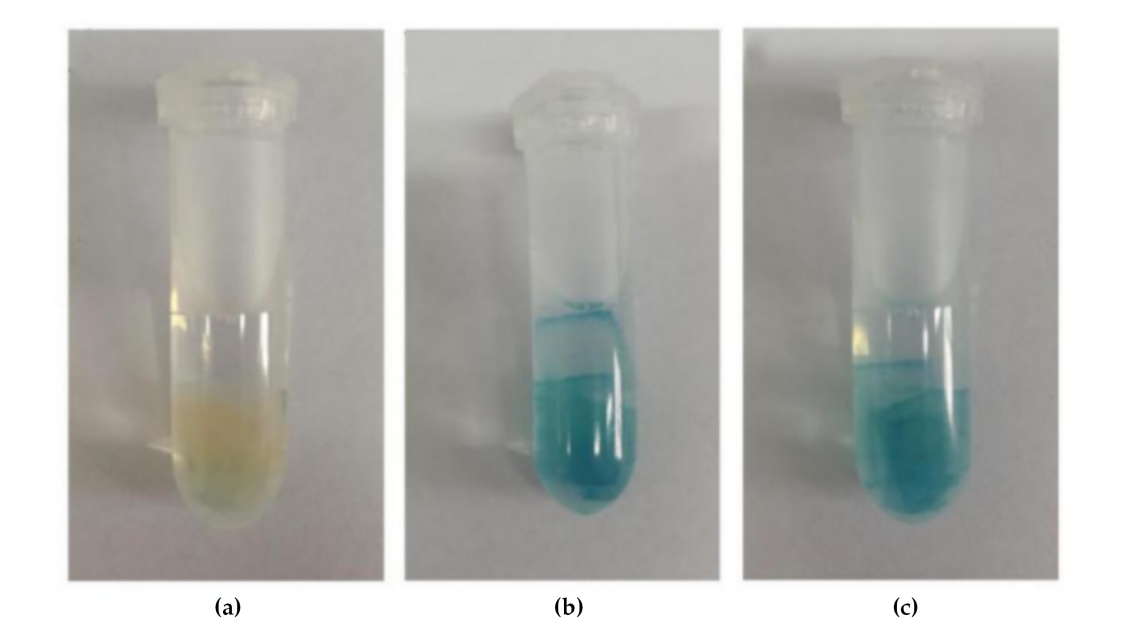
**Table S1.** Primers for Quantitative Real-Time PCR.

| **Primer** | **Peach Gene ID** | **Forward primer（5'-3'）** | **Reverse primer（5'-3'）** |
| --- | --- | --- | --- |
| *PpPG* | *ppa006857m* | ATTGGCATCCCTAAACAG | CAAGCAACGCCTTCTATC |
| *PpPE* | *ppa021753m* | ACCCAGATGGATGGACAC | CGAAGCGAACAGGAACCC |
| *Ppβ-GAL* | *ppa001412m* | ACCAACATTGACAAACTCT | GGAGCATCATACGACTTG |
| *PpTIR1* | *ppa003344m* | CTTTGTATAATTGAGCCCCGAACT | CCAATATACTCAAACGCACGATCA |
| *PpIAA1* | *ppa011843m* | GATCACACAGATGCCCCTCC | GCTCCATCGACGCTTACTTTCA |
| *PpIAA3* | *ppa011755m* | AGCTGCCAAAAGATGTGACCAA | CACATAAATCCCACAACCCTCC |
| *PpIAA5* | *ppa011935m* | AAAGCGAAACGAAGAACCAAG | GCTCCATCCATGCTAACCTTGAC |
| *PpIAA9*  *PpIAA27*  *PpARF2’*  *PpARF4*  *PpARF5*  *PpARF7*  *PpARF10*  *PpARF12* | *ppa006744m*  *ppa007893m*  *ppa022314m*  *ppa001557m*  *ppa000946m*  *ppa000708m*  *ppa002082m*  *ppa002617m* | GTATGCCACAATAGCTCGGAA  TCTTCCTCTGCCCTCTCCACA GCTCCGTGTTGGTGTTAGAC  CGGTGATGTGCTCTAATGCTACT  GAAGGGCTGCTAAATGACCCAAGA  AATTGAGCCTGTTGTAACTCC  CCAATCGGACGCTAACAAT  ACCTTTTGTGGCTTCTATACCTG | GAAGCCCAAGTCTAAGGTCTGT  AGAGACCCCAATTCCAAGTCC  GGCTTGTTCTTGGCTTGTAGTA  GCTACTCTCCTGCGGCTTATG  ATACAGCGAACACAACCAACGA  TGCCAAAGTCATCTCCAAGCCAA  GTGCCTGAACTTCCATATCTC  ATGGTTTTCACTTCTTTTGCCTT |
| *PpTEF-2* | *ppa001368m* | GTTGCCTTGGTCGGTCTTGA | ATTGAACAGCAACACGCACAA |
|  |  |  |  |

**Figure S1.** GUS staining to verify the success of PpTIR1 overexpression gene in an isolated peach fruit block. (a) Untreated peach fruit block (negative control); (b) peach fruit block of transient transformation in a pCAMBIA3301-121peach fruit block (positive control); (c) peach fruit block of transient transformation in a pCAMBIA3301-121-PpTIR1 peach fruit block.
